# Supplementary material for: BRAF<sup>V600E</sup> Induction in Thyrocytes Triggers Important Changes in the miRNAs Content and the Populations of Extracellular Vesicles Released in Thyroid Tumor Microenvironment
Source: Preprints.org preprint supplement (doi:10.20944/preprints202203.0260.v1), 2022-03-18
Supplement: Supplementary file 1 [file supplementary]

Supplementary Materials

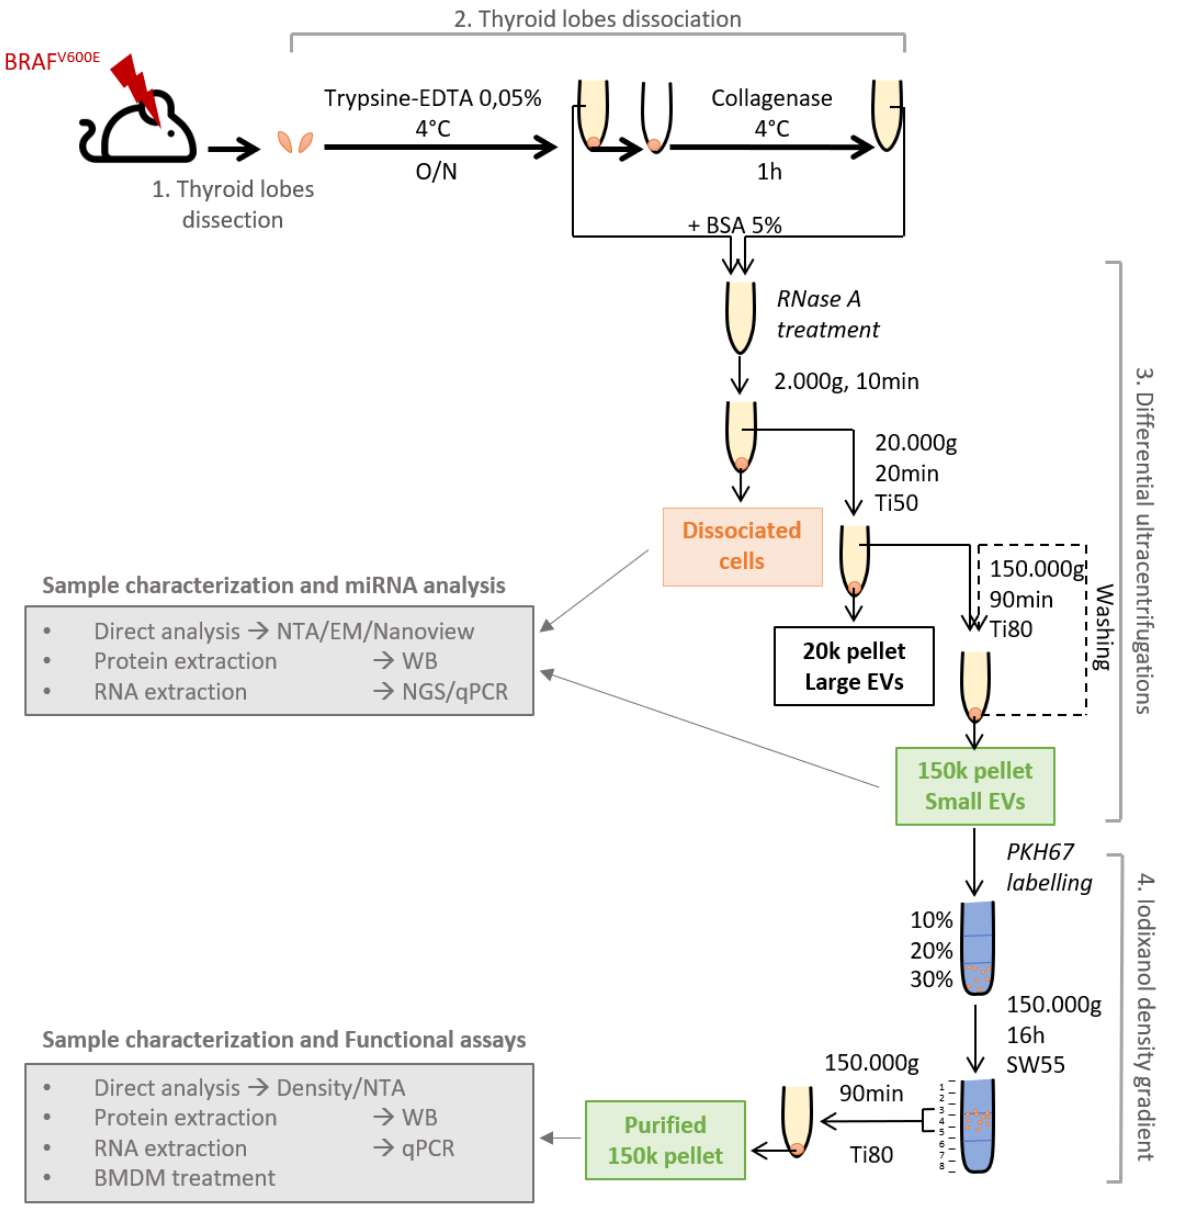

**Figure S1: *In vivo* produced EVs are isolated from thyroid lobes by tissue dissociation followed by differential ultracentrifugation and optional iodixanol density gradient.** Schematic representation of the procedure for EV isolation, characterization, and downstream analyses.

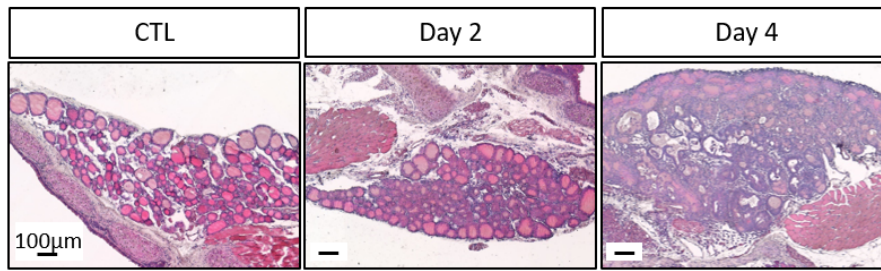

**Figure S2: BRAF<sup>V600E</sup> expression in thyrocytes triggers tissue growth and remodelling** Low-magnification view of the haematoxylin and eosin staining of thyroid tissues from control and doxycycline-treated mice, after 2 and 4 days of intraperitoneal injections, shown in Fig.1A.

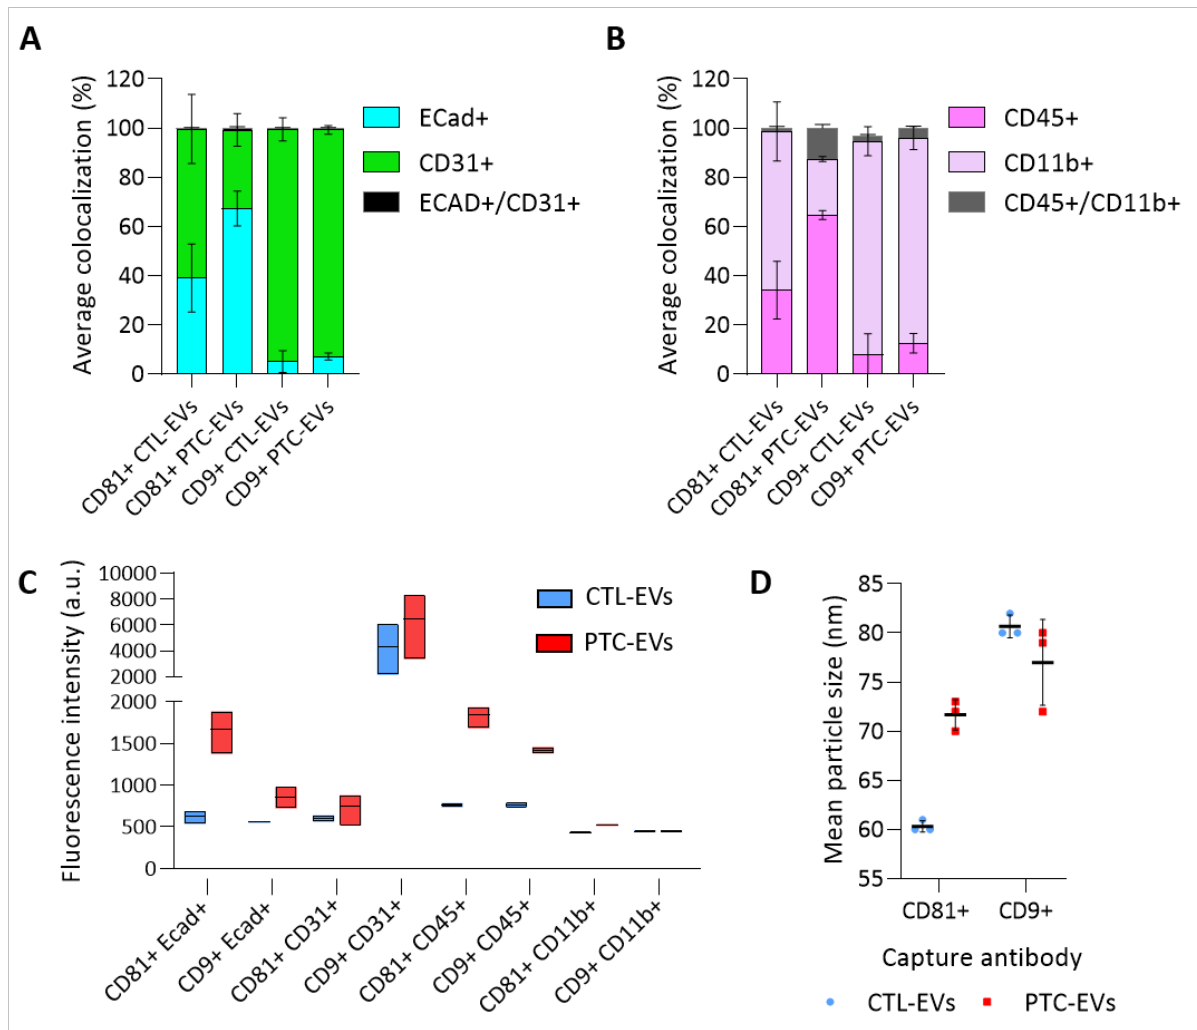

**Figure S3: The ExoView platform allows EV population analyses.** (A-B) Average percentage of colocalization between Ecad and CD31 detection antibodies (A), and between CD45 and CD11b detection antibodies (B). (C) Fluorescence intensity of detection antibodies measured in CD9+ and CD81+ EV populations in control and PTC- EV samples, reflecting the number of detected epitopes. (D) Mean particles size of CD9+ and CD81+ EVs measured in CTL and PTC-EV samples.

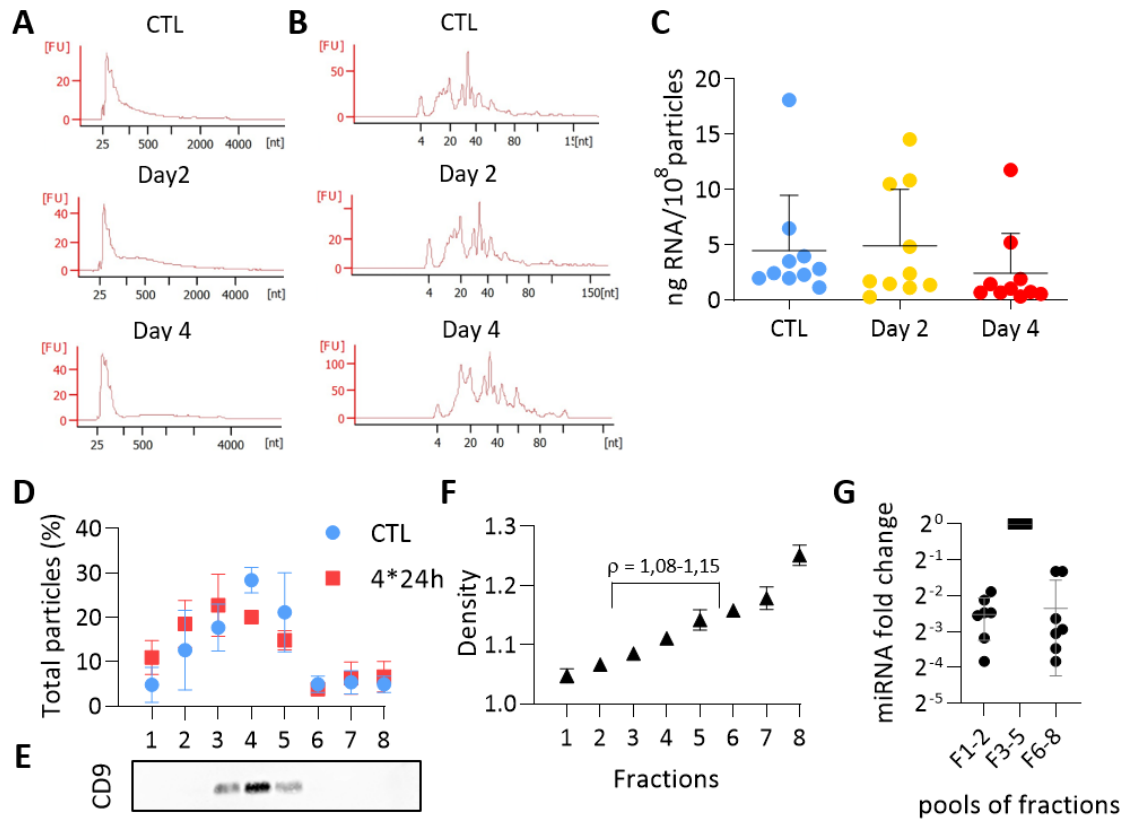

**Figure S4: miRNAs detected in the high-speed pellets are associated with EV fractions after density-based fractionation.** Electrophoretic profiles of (A) total RNA, and (B) small RNA extracted from the 150k pellet isolated from control and DOX-treated thyroids, after 2 and 4 days of injections. (C) Total RNA quantity per 10<sup>8</sup> particles (measured by NTA). (D-G) Characterization of 8 fractions obtained after bottom-up iodixanol density gradient. (D) Distribution of particles measured by NTA. (E) Western blot detection of CD9 marker after purification of the 150k pellet isolated from day 4 DOX-treated thyroids. (F) Measure of the density of each fraction. (G) RT-qPCR analysis of 8 miRNAs in concentrated pools of fractions. Data are expressed as miRNA fold changes in pools of fractions 1-2 and 6-8 compared to their abundance in pool of fractions 3 to 5, considered as EV fractions.

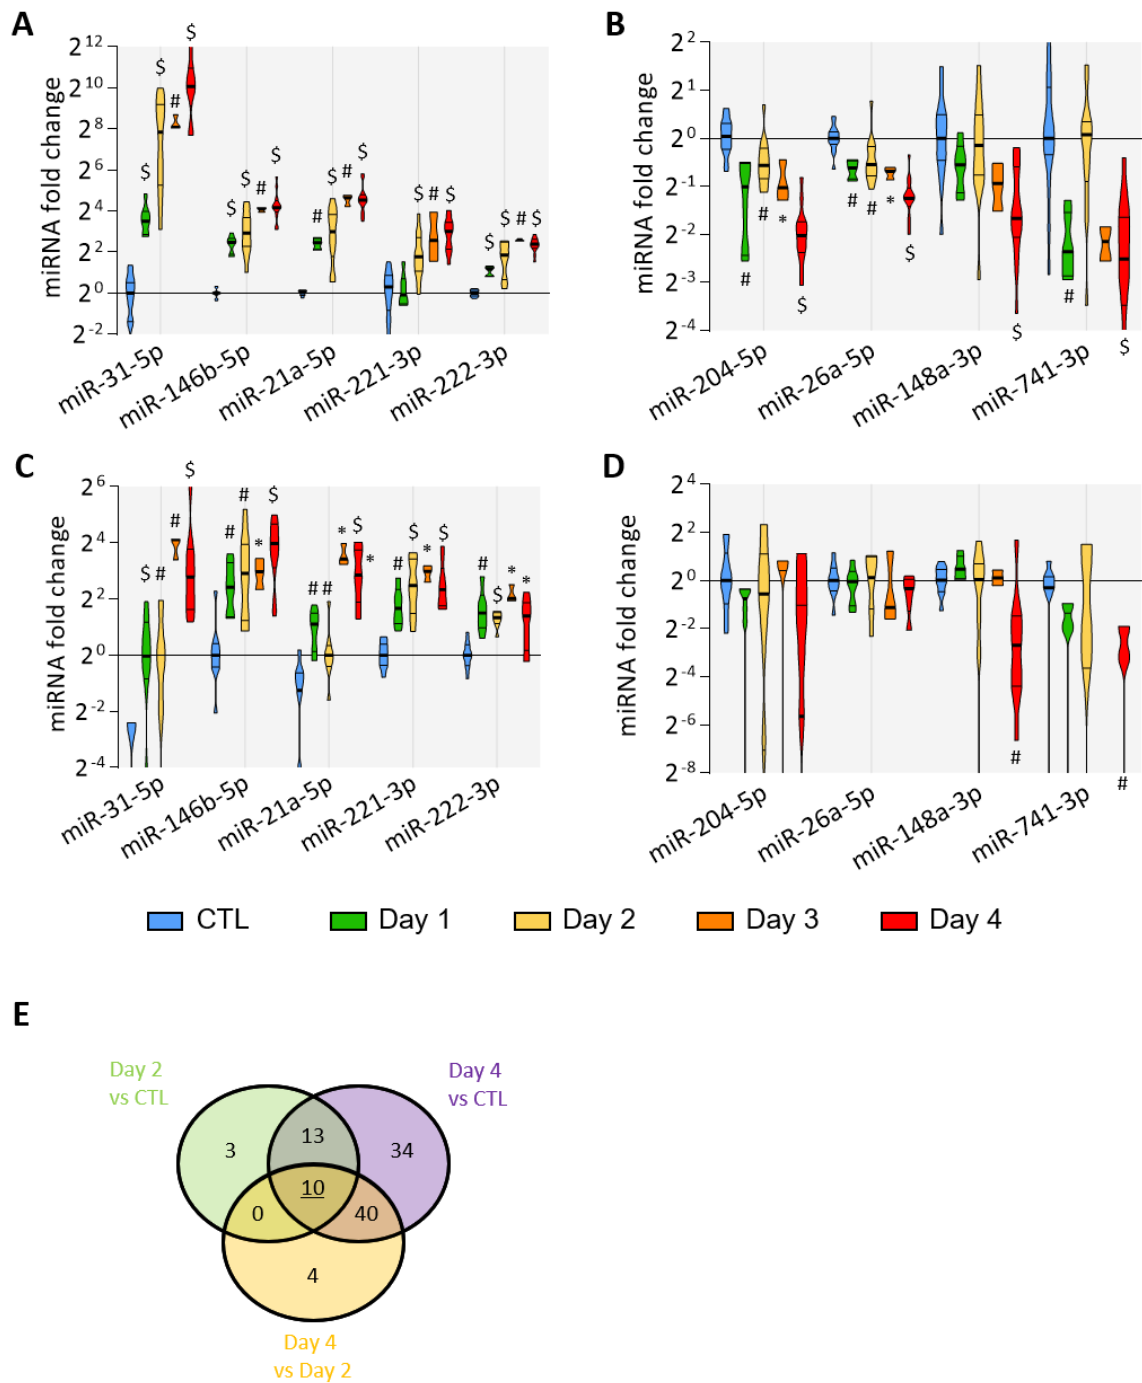

**Figure S5: miRNAs display rapid and important changes in their abundance in BRAF<sup>V600E</sup> tissues and EVs.** RT-qPCR analyses of upregulated (A, B) and downregulated (C, D) miRNA in dissociated cells (A, C) and EVs (B, D) from control and doxycycline-treated thyroids after 1, 2, 3 and 4 days of injections (n≥4). MiRNA fold changes are normalized on let-7c-5p expression for cellular samples, and on the geometric mean of miR-126a-3p and let-7b-5p expression for EV samples. Data are expressed as mean ± SD (\* p<0.05; # p<0.01; \$ p<0.001). (E) Venn diagram illustrating the number of EV-miRNAs with differential abundance in the three groups. Abundance of 10 miRNAs was statistically different between the 3 groups.

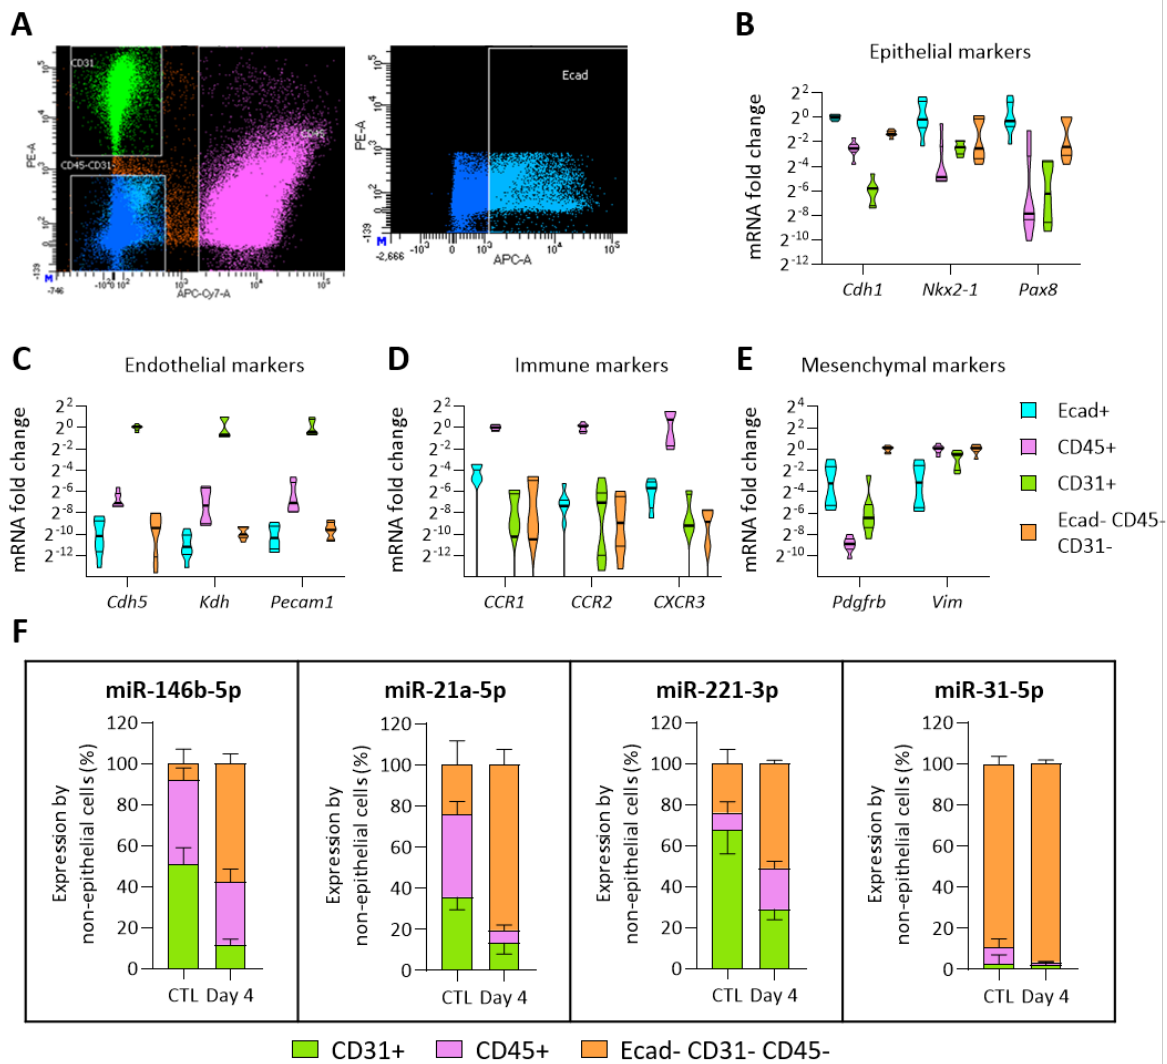

**Figure S6: Purification of epithelial, endothelial and immune populations by FACS-sorting of thyroid and tumour dissociated cells using Ecad, CD31 and CD45 markers.** (A) Coloured dot plot showing an example of DOX day 4 dissociated cells sorting according to the intensity of fluorescence with CD31, CD45 or Ecad antibodies. (B-E) RT-qPCR analyses of the expression of epithelial (B), endothelial (C), immune (D) and mesenchymal (E) markers in sorted populations. mRNA fold changes are normalized on the geometric mean of *Rpl27* and *Gapdh* expression and compared to the expression in their respective population. (F) RT-qPCR analyses of miRNA expression in FACS-sorted non-epithelial cell populations. Stacked bars show the relative expression of the miRNAs in non-epithelial cell populations normalized by the quantity of RNA extracted from each population. Data are expressed as mean  $\pm$  SD.

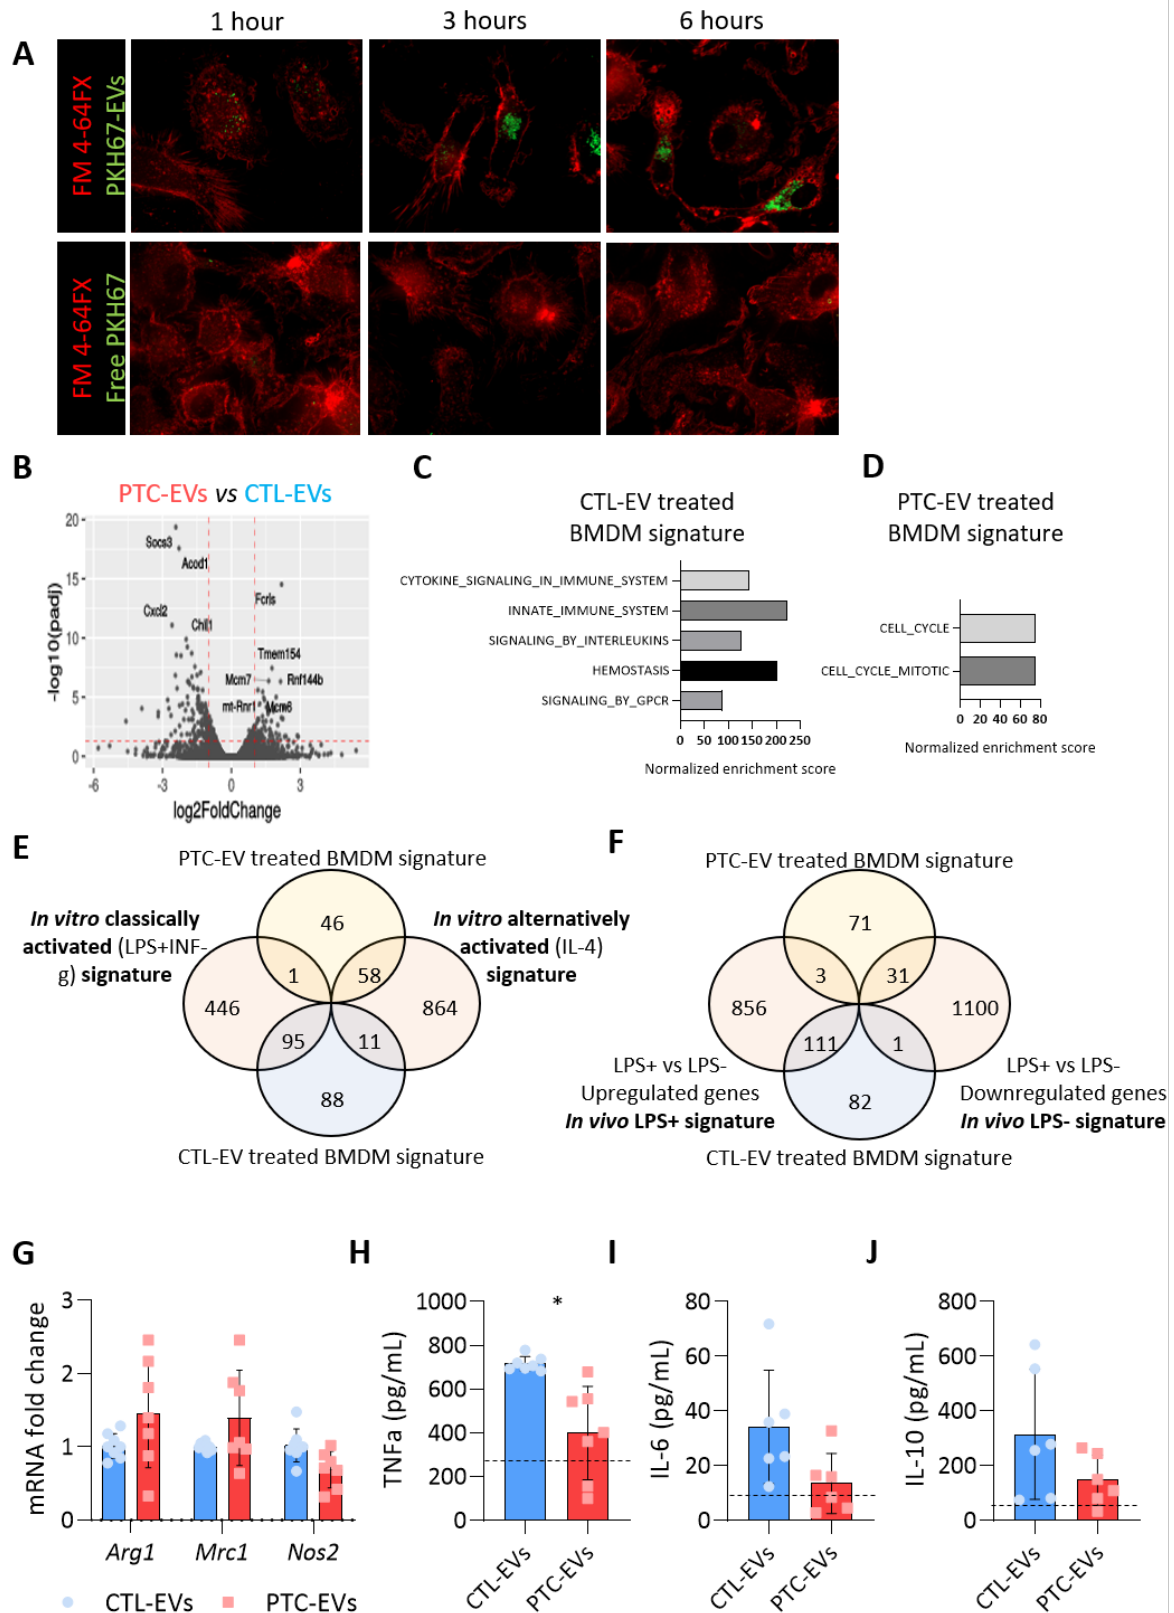

**Figure S7: Treatment of BMDM with CTL-EVs or PTC-EVs pools demonstrate internalization but no major effects.** (A) Live imaging of BMDM fluorescently labelled by FM 4-64FX, a red membrane dye, and treated with PKH67-EVs or free PKH67 after 1, 3 or 6 hours of incubation. (B) Volcano plot showing

p-adjusted value and fold change relation in differential analysis of mRNA expression by CTL-EVs or PTC-EVs treated BMDM. KEGG pathway analysis of gene upregulated in CTL-EVs treated BMDM compared to PTC-EVs treated BMDM (C) and of gene upregulated in PTC-EVs treated BMDM compared to CTL-EVs treated BMDM (D). (E-F) Comparison of the mRNA signature of EV-treated BMDM with publicly available mRNA signature of (E) *in vitro* (LPS+INFg vs IL-4; GSE69607) or (F) *in vivo* (LPS+ vs LPS-; GSE38705) polarized macrophages (G). RT-qPCR analyses of *Arg1*, *Mrc1* and *Nos2* expression in non-treated, CTL-EVs or PTC-EVs treated BMDM (n=6). mRNA fold changes are normalized on the geometric mean of *Rpl27* and *Gapdh* expression. Data are expressed as mean  $\pm$  SD; differences are not significant. (H-J) Concentration of TNF $\alpha$ , IL-6 and IL-10 released in BMDM medium after 24h of treatment with CTL-EVs and PTC-EVs compared to the basal production level in non-treated BMDM (dotted line).

**Table S1:** Sequences of primers used in mRNAs RT-qPCR.

| Gene          | Forward primer           | Reverse primer            |
|---------------|--------------------------|---------------------------|
| <i>Fos1</i>   | CCGGCCAGGAGTCATACG       | CTGCTAGCTTGTTCCGCTCG      |
| <i>Dusp5</i>  | CCAGTGTGGAAAGCCCGTT      | CGCACTTGGATGCGTGGTA       |
| <i>Pax8</i>   | CGGCGATGCCTCACAACCTCG    | CCGGATGCTGCCAGTCTCGT      |
| <i>Nkx2.1</i> | ATCTGAGCTGGGGTGCTGGG     | GCCCTGTCTGTACGCTGCGA      |
| <i>Nis</i>    | AGCAGGCTTAGCTGTATCCC     | AGCCCCGTAGTAGAGATAGGAG    |
| <i>Tg</i>     | TGGGACGTGAAAGGGGAATGGTGC | GTGAGCTTTTGGAAATGGCAGGCGA |
| <i>Tpo</i>    | TGCCAACAGAAGCATGGGCAAC   | GCACAAAGTCCCATTGTCCAC     |
| <i>Tshr</i>   | CTGCGGGGCAAAGAGTGTGC     | AGGGGAGCTCTGTCAAGGCA      |
| <i>Rpl27</i>  | GCCCTGGTGGCTGGAATTGACC   | AAACTTGACCTTGGCCTCCC GC   |
| <i>Gapdh</i>  | TGCACCACCAACTGCTTAGC     | GGATGCAGGGATGATGTTCT      |

**Table S2:** List of antibodies used.

| <b>Antibodies used in western blot</b>                                                     |                     |                |                             |                  |                              |
|--------------------------------------------------------------------------------------------|---------------------|----------------|-----------------------------|------------------|------------------------------|
| <b>Antibody</b>                                                                            | <b>Isotype</b>      | <b>Clone</b>   | <b>Supplier</b>             | <b>Reference</b> | <b>Working dilution</b>      |
| <b>Calnexin</b>                                                                            | Rabbit              | polyclonal     | Enzo                        | ADI-SPA-860      | 1:10000                      |
| <b>PDI</b>                                                                                 | Rabbit              | C81H6          | Cell signaling technologies | 3501             | 1:1000                       |
| <b>CD63</b>                                                                                | Rat                 | NVG-2          | Biolegend                   | 143902           | 1:500                        |
| <b>CD81</b>                                                                                | Rabbit              | D502Q          | Cell signaling technologies | 10037            | 1:400                        |
| <b>CD9</b>                                                                                 | Rat                 | KMC8.8         | eBiosciences                | 14-0091-82       | 1:200                        |
| <b>Alix</b>                                                                                | Mouse               | C-11           | Santa Cruz                  | sc-271975        | 1:500                        |
| <b>Flotillin-1</b>                                                                         | Mouse               | 18/Flotillin-1 | BD transduction             | 610820           | 1:500                        |
| <b>Antibody used in immunohistofluorescence</b>                                            |                     |                |                             |                  |                              |
| <b>Antibody</b>                                                                            | <b>Isotype</b>      | <b>Clone</b>   | <b>Supplier</b>             | <b>Reference</b> | <b>Working dilution</b>      |
| <b>CD206</b>                                                                               | Rabbit              | E6T5J          | Cell signaling technologies | 24595            | 1:500                        |
| <b>Fluorochrome-conjugated antibodies for FACS, flow cytometry and ExoView experiments</b> |                     |                |                             |                  |                              |
| <b>Antibody</b>                                                                            | <b>Fluorochrome</b> | <b>Clone</b>   | <b>Supplier</b>             | <b>Reference</b> | <b>Working concentration</b> |
| <b>CD3</b>                                                                                 | Alexa 700           | 17A2           | biolegend                   | 100216           | 10 µg/ml                     |
| <b>CD11b</b>                                                                               | BV510/FITC          | M1/70          | biolegend                   | 101263/101205    | 2 µg/ml                      |
| <b>CD31</b>                                                                                | PE                  | MEC13.3        | BD biosciences              | 553373           | 2 µg/ml                      |
| <b>CD45</b>                                                                                | APC-Cy7             | 30-F11         | BD biosciences              | 557659           | 1 µg/ml                      |
| <b>Ecad</b>                                                                                | Alexa 647           | DECMA-1        | biolegend                   | 147308           | 15 µg/ml                     |



**Table S3:** Sequences of primers and probes used in miRNAs RT-qPCR.

| miRNA ID        | Sequence                | Loop-Reverse primer                         | Forward primer               | Probe             |
|-----------------|-------------------------|---------------------------------------------|------------------------------|-------------------|
| mmu-miR-31-5p   | AGGCAAGAUGCUGGCAUAGCUG  | CTCAACTGGTGTCTGGAGTCGGCAATTCAGTTGAGCAGCTATG | ACACTCCAGCTGGGAGGCAAGATGCTG  | TCAGTTGAGCAGCTATG |
| mmu-miR-146b-5p | UGAGAACUGAAUUCUAGGCU    | CTCAACTGGTGTCTGGAGTCGGCAATTCAGTTGAGAGCCTATG | ACACTCCAGCTGGGTGAGAACTGAATTC | TCAGTTGAGAGCCTAT  |
| mmu-miR-21a-5p  | UAGCUUAUCAGACUGAUGUUGA  | CTCAACTGGTGTCTGGAGTCGGCAATTCAGTTGAGTCAACATC | ACACTCCAGCTGGGTAGCTTATCAGACT | TCAGTTGAGTCAACATC |
| mmu-miR-222-3p  | AGCUACAUCUGGCUACUGGGU   | CTCAACTGGTGTCTGGAGTCGGCAATTCAGTTGAGACCCAGTA | ACACTCCAGCTGGGAGCTACATCTGGC  | TCAGTTGAGACCCAGT  |
| mmu-miR-221-3p  | AGCUACAUUGUCUGCUGGGUUUC | CTCAACTGGTGTCTGGAGTCGGCAATTCAGTTGAGGAAACCCA | ACACTCCAGCTGGGAGCTACATTGTCT  | TCAGTTGAGGAAACCCA |
| mmu-miR-26a-5p  | UUCAAGUAAUCCAGGAUAGGCU  | CTCAACTGGTGTCTGGAGTCGGCAATTCAGTTGAGAGCCTATC | ACACTCCAGCTGGGTTCAAGTAATCCA  | TCAGTTGAGAGCCTATC |
| mmu-miR-204-5p  | UUCCCUUUGUCAUCCUAGCCU   | CTCAACTGGTGTCTGGAGTCGGCAATTCAGTTGAGAGGCATAG | ACACTCCAGCTGGGTTCCCTTTGTCAT  | TCAGTTGAGAGGCATAG |
| mmu-miR-148a-5p | AAAGUUCUGAGACACUCCGACU  | CTCAACTGGTGTCTGGAGTCGGCAATTCAGTTGAGAGTCGGAG | ACACTCCAGCTGGGAAAGTTCTGAGAC  | TCAGTTGAGAGTCGGAG |
| mmu-miR-148a-3p | UCAGUGCACUACAGAACUUUGU  | CTCAACTGGTGTCTGGAGTCGGCAATTCAGTTGAGACAAAGTT | ACACTCCAGCTGGGTGAGTGCCTACA   | TCAGTTGAGACAAAGTT |
| mmu-miR-741-3p  | UGAGAGAUGCCAUUCUAGUAGA  | CTCAACTGGTGTCTGGAGTCGGCAATTCAGTTGAGTCTACATA | ACACTCCAGCTGGGTGAGAGATGCCAT  | TCAGTTGAGTCTACATA |
| mmu-miR-30d-5p  | UGUAAACAUCCCGACUGGAAG   | CTCAACTGGTGTCTGGAGTCGGCAATTCAGTTGAGCTTCCAGT | ACACTCCAGCTGGGTGTAACATCCCC   | TCAGTTGAGCTTCCAGT |
| mmu-miR-99a-5p  | AACCCGUAGAUCCGAUCUUGUG  | CTCAACTGGTGTCTGGAGTCGGCAATTCAGTTGAGCACAAGAT | ACACTCCAGCTGGGAACCCGTAGATCC  | TCAGTTGAGCACAAGAT |
| mmu-miR-10b-5p  | UACCCUGUAGAACCGAAUUUGUG | CTCAACTGGTGTCTGGAGTCGGCAATTCAGTTGAGCACAATTC | ACACTCCAGCTGGGTACCTGTAGAAC   | TCAGTTGAGCACAATTC |
| mmu-let-7f-5p   | UGAGGUAGUAGAUUGUAUAGUU  | CTCAACTGGTGTCTGGAGTCGGCAATTCAGTTGAGAACTATAC | ACACTCCAGCTGGGTGAGGTAGTAGAT  | TCAGTTGAGAACTATAC |
| mmu-miR-126a-3p | UCGUACCGUGAGUAAUAAUGCG  | CTCAACTGGTGTCTGGAGTCGGCAATTCAGTTGAGCGCATTAT | ACACTCCAGCTGGGTCTACCGTGAGT   | TCAGTTGAGCGCATTAT |
| mmu-let-7b-5p   | UGAGGUAGUAGGUUGUGUGUU   | CTCAACTGGTGTCTGGAGTCGGCAATTCAGTTGAGAACCACAC | ACACTCCAGCTGGGTGAGGTAGTAGGT  | TCAGTTGAGAACCACAC |
| mmu-let-7c-5p   | UGAGGUAGUAGGUUGUAUGUU   | CTCAACTGGTGTCTGGAGTCGGCAATTCAGTTGAGAACCATAC | ACACTCCAGCTGGGTGAGGTAGTAGGT  | TCAGTTGAGAACCATAC |

**Table S4:** List of the most frequently sequenced miRNAs in EVs isolated from control thyroids, with the associated count per million (CPM).

| <b>Name</b>        | <b>Mean CPM</b> |
|--------------------|-----------------|
| <b>miR-125b-5p</b> | 213400          |
| <b>let-7c-5p</b>   | 100233          |
| <b>let-7b-5p</b>   | 83644           |
| <b>let-7f-5p</b>   | 76620           |
| <b>miR-125a-5p</b> | 66392           |
| <b>let-7a-5p</b>   | 58649           |
| <b>miR-126a-3p</b> | 40698           |
| <b>miR-30d-5p</b>  | 37117           |
| <b>miR-29a-3p</b>  | 35818           |
| <b>miR-16-5p</b>   | 34094           |
| <b>miR-148a-3p</b> | 31128           |
| <b>let-7i-5p</b>   | 29743           |
| <b>miR-26a-5p</b>  | 23394           |
| <b>miR-199a-3p</b> | 19919           |
| <b>miR-30a-5p</b>  | 16369           |
| <b>miR-143-3p</b>  | 16316           |
| <b>let-7e-5p</b>   | 13416           |
| <b>miR-200a-3p</b> | 11859           |
| <b>miR-191-5p</b>  | 11082           |
| <b>miR-26b-5p</b>  | 10077           |

**Table S5:** List of the most frequently sequenced miRNAs in EVs isolated from doxycycline-treated thyroids after 2 days of injections, with the associated count per million (CPM).

| <b>Name</b>        | <b>Mean CPM</b> |
|--------------------|-----------------|
| <b>miR-125b-5p</b> | 147446          |
| <b>let-7f-5p</b>   | 75838           |
| <b>let-7b-5p</b>   | 73932           |
| <b>let-7c-5p</b>   | 72227           |
| <b>let-7a-5p</b>   | 56754           |
| <b>miR-126a-3p</b> | 43233           |
| <b>miR-125a-5p</b> | 42283           |
| <b>let-7i-5p</b>   | 39875           |
| <b>miR-16-5p</b>   | 39776           |
| <b>miR-29a-3p</b>  | 37769           |
| <b>miR-148a-3p</b> | 30527           |
| <b>miR-30d-5p</b>  | 25504           |
| <b>miR-21a-5p</b>  | 21269           |
| <b>miR-199a-3p</b> | 20696           |
| <b>miR-26a-5p</b>  | 19705           |
| <b>miR-143-3p</b>  | 19673           |
| <b>miR-30a-5p</b>  | 15666           |
| <b>let-7e-5p</b>   | 14275           |
| <b>miR-221-3p</b>  | 10761           |
| <b>miR-200a-3p</b> | 10619           |

**Table S6:** List of the most frequently sequenced miRNAs in EVs isolated from doxycycline-treated thyroids after 4 days of injections, with the associated count per million (CPM).

| <b>Name</b>        | <b>Mean CPM</b> |
|--------------------|-----------------|
| <b>miR-125b-5p</b> | 113447          |
| <b>miR-126a-3p</b> | 52815           |
| <b>let-7b-5p</b>   | 52375           |
| <b>let-7c-5p</b>   | 48836           |
| <b>miR-16-5p</b>   | 47741           |
| <b>let-7f-5p</b>   | 47140           |
| <b>miR-21a-5p</b>  | 41538           |
| <b>let-7a-5p</b>   | 38777           |
| <b>let-7i-5p</b>   | 38526           |
| <b>miR-125a-5p</b> | 26307           |
| <b>miR-29a-3p</b>  | 24603           |
| <b>miR-199a-3p</b> | 15656           |
| <b>miR-143-3p</b>  | 13213           |
| <b>miR-221-3p</b>  | 13163           |
| <b>miR-30d-5p</b>  | 12642           |
| <b>let-7e-5p</b>   | 11214           |
| <b>miR-26a-5p</b>  | 11184           |
| <b>miR-191-5p</b>  | 9513            |
| <b>miR-146b-5p</b> | 8998            |
| <b>miR-23a-3p</b>  | 8789            |

**Table S7:** List of miRNAs with a differential abundance, expressed in logFC, in EVs isolated at day 2 and day 4, as compared to control thyroids. MiRNAs marked with a “\*” also present a differential abundance in the 4\*24h and 2\*24h samples.

| Name            | 2*24h vs CTL | 4*24h vs CTL |
|-----------------|--------------|--------------|
| miR-31-5p *     | 4.127        | 5.472        |
| miR-135b-5p *   | 2.830        | 3.913        |
| miR-21a-3p      | 3.110        | 3.643        |
| miR-21a-5p *    | 2.465        | 3.466        |
| miR-146b-5p     | 3.102        | 3.360        |
| miR-155-5p *    | 1.584        | 3.081        |
| miR-223-5p      | 2.426        | 3.066        |
| miR-5099        | 2.046        | 2.970        |
| miR-223-3p *    | 1.783        | 2.924        |
| miR-142a-5p *   | 1.354        | 2.669        |
| miR-20a-5p      | 1.914        | 2.582        |
| miR-142a-3p *   | 1.574        | 2.533        |
| miR-184-3p      | 1.877        | 2.263        |
| miR-221-3p      | 1.874        | 2.207        |
| miR-218-5p      | 1.655        | 1.917        |
| miR-484         | 1.477        | 1.843        |
| miR-674-5p      | 1.270        | 1.647        |
| miR-125b-1-3p * | 0.825        | 1.646        |
| miR-222-3p      | 1.220        | 1.511        |
| miR-125a-5p     | -0.665       | -1.303       |
| miR-206-3p      | -1.365       | -1.490       |
| miR-200c-3p *   | -0.639       | -1.786       |
| miR-204-5p *    | -1.040       | -2.773       |
